# Supplementary material
Source: PubMed Central journal article supplement (PMC5462045)
Supplement: supp_pp.17.00317_PP2017-RA-00317D_Supplemental_Material_Figures_1_to_8.pdf [file supp_pp.17.00317_PP2017-RA-00317D_Supplemental_Material_Figures_1_to_8.pdf]

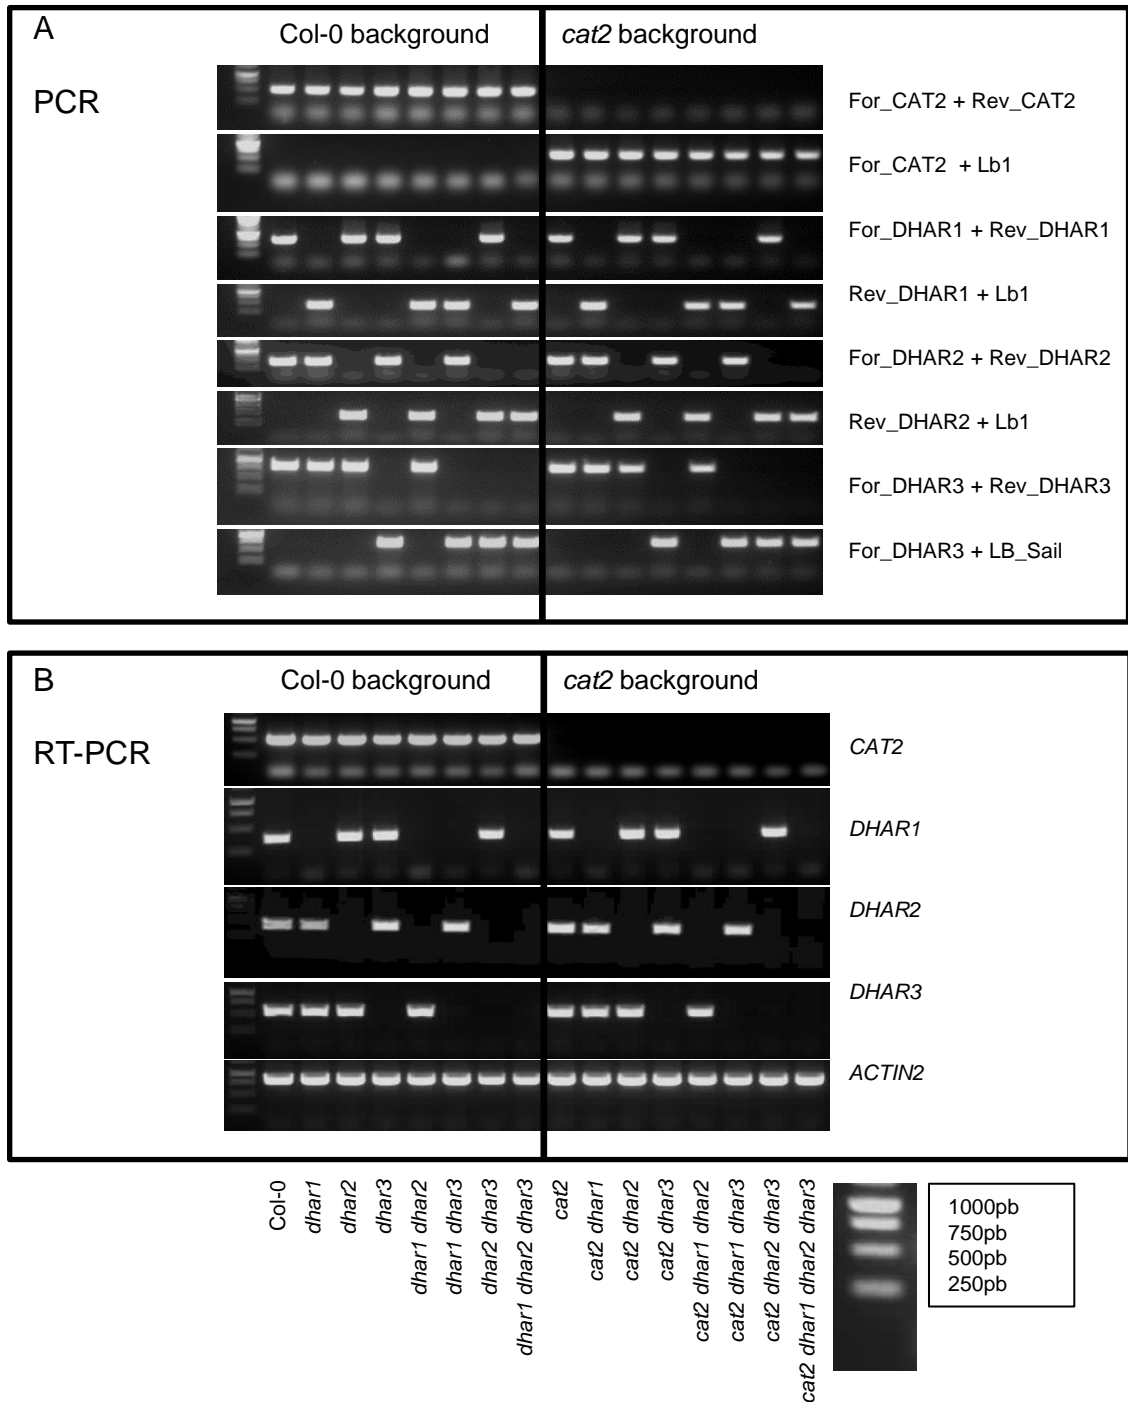

**Supplemental Figure S1.** Genotyping (A) and analysis of transcript abundance (B) in *dhar* mutant lines used in this study. The left half of the gels show data for *dhar* mutations in the Col-0 background, whereas plant lines shown on the right also carried the *cat2* mutation. Names of mutant lines are given at the bottom.

A, Plants were genotyped by PCR analysis.

B, Transcripts were measured by semi-quantitative RT-PCR

See Supplemental Table S6 for PCR and RT-PCR primers.

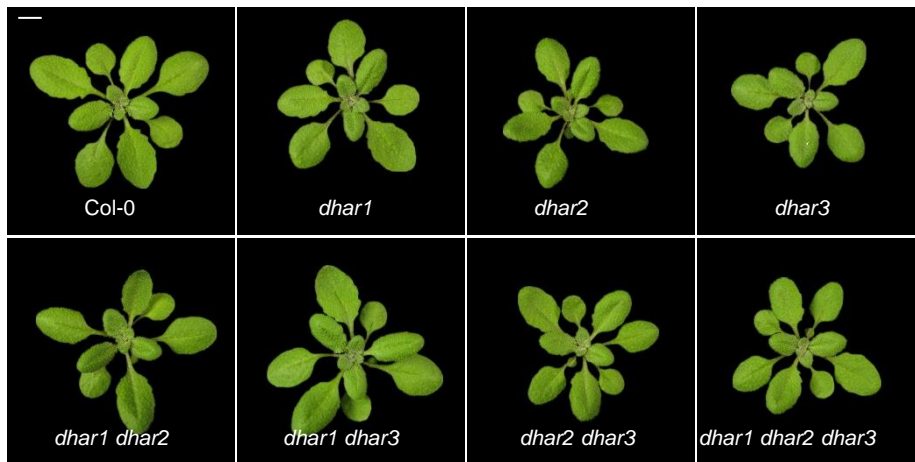

**Supplemental Figure S2.** Photographs of *dharc* mutants after three weeks growth at an irradiance of  $200 \mu\text{mol}\cdot\text{m}^{-2}\cdot\text{s}^{-1}$  in a 16h photoperiod. The white bar indicates 1 cm.

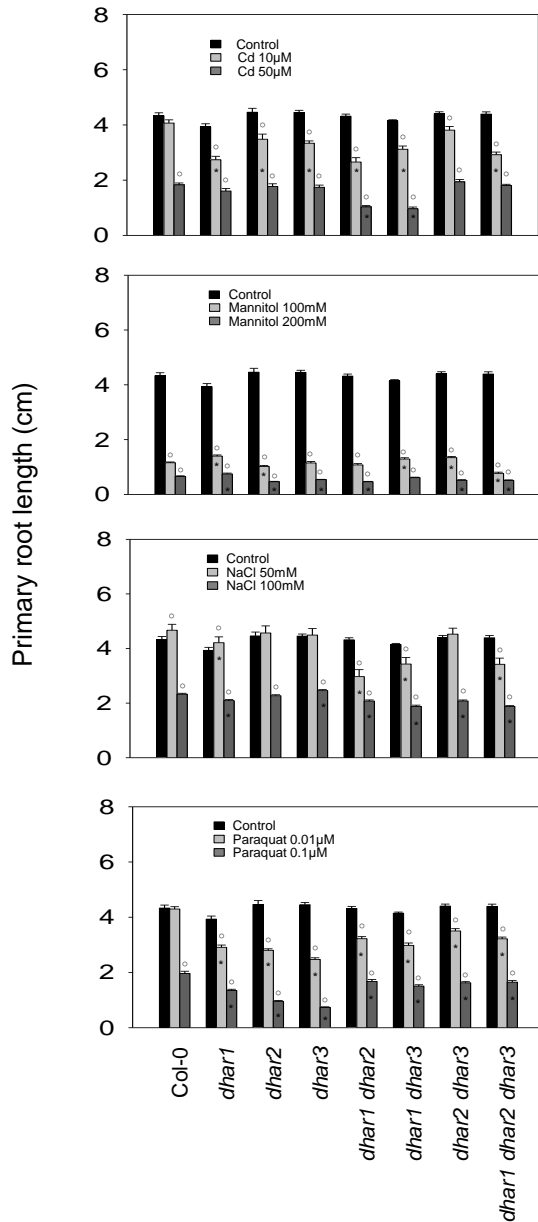

**Supplemental Figure S3.** Effects of various stresses on root growth in *dhar* mutants.

All data are means of 45 biological replicates. \*Indicates significant impact of *dhar* mutation compared to Col-0 in the same stress condition (light gray and dark gray bars) and o indicates significant impact of stress in each line compared to control (black bars) at P-value < 0.05. The experiment was repeated three times and similar results were obtained.

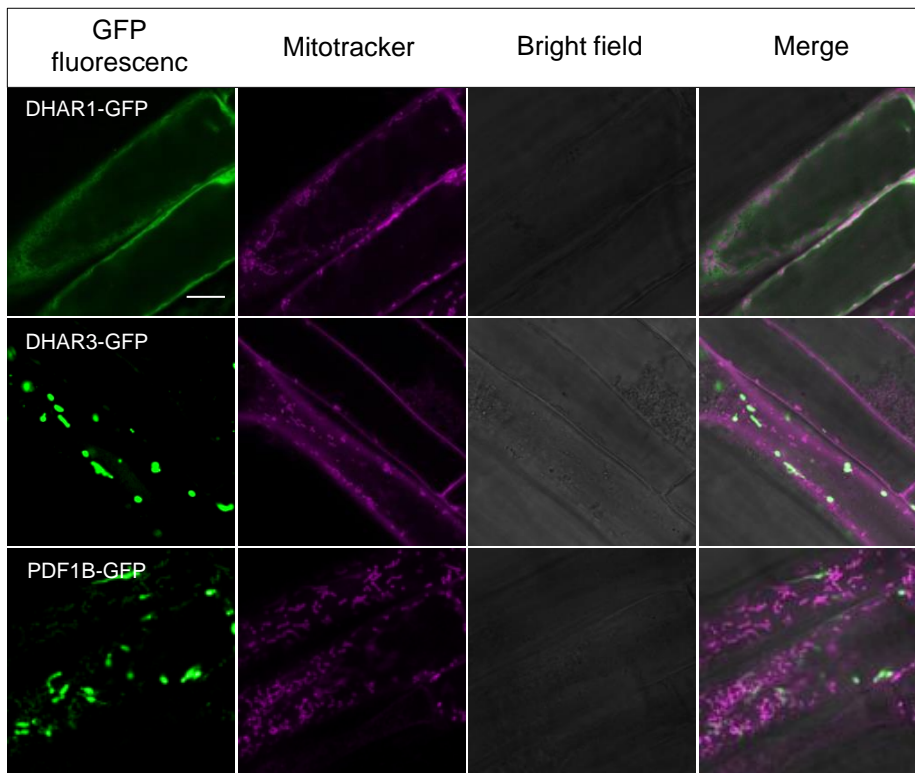

**Supplemental Figure S4.** Subcellular localization of DHAR1 and DHAR3 in roots. Comparison of DHAR1-GFP and DHAR3-GFP with the mitochondrial marker, mitotracker and the dual plastid-mitochondrion marker, PDF1B-GFP (Gigliione et al., 2000). The scale bar indicates 10  $\mu\text{m}$ .

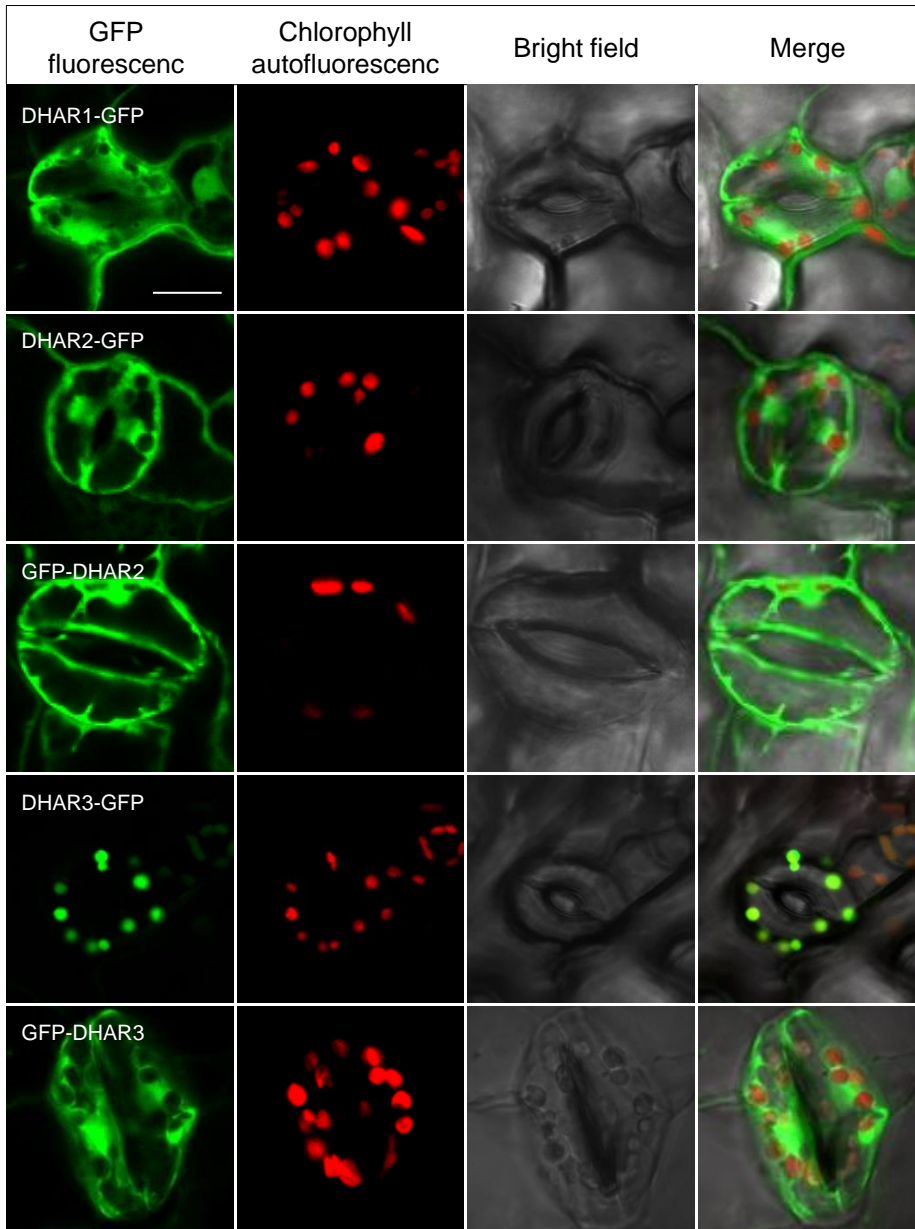

**Supplemental Figure S5.** Subcellular localization of DHARs in the absence of the *cat2* mutation. The indicated fusion proteins were expressed in the triple mutant *dhar1 dhar2 dhar3*. The images correspond to epidermal cells of the leaves of 10 day old seedlings. From left to right : GFP fluorescence (green), chlorophyll autofluorescence (red), bright field and merged images. The scale bar indicates 10  $\mu$ m.

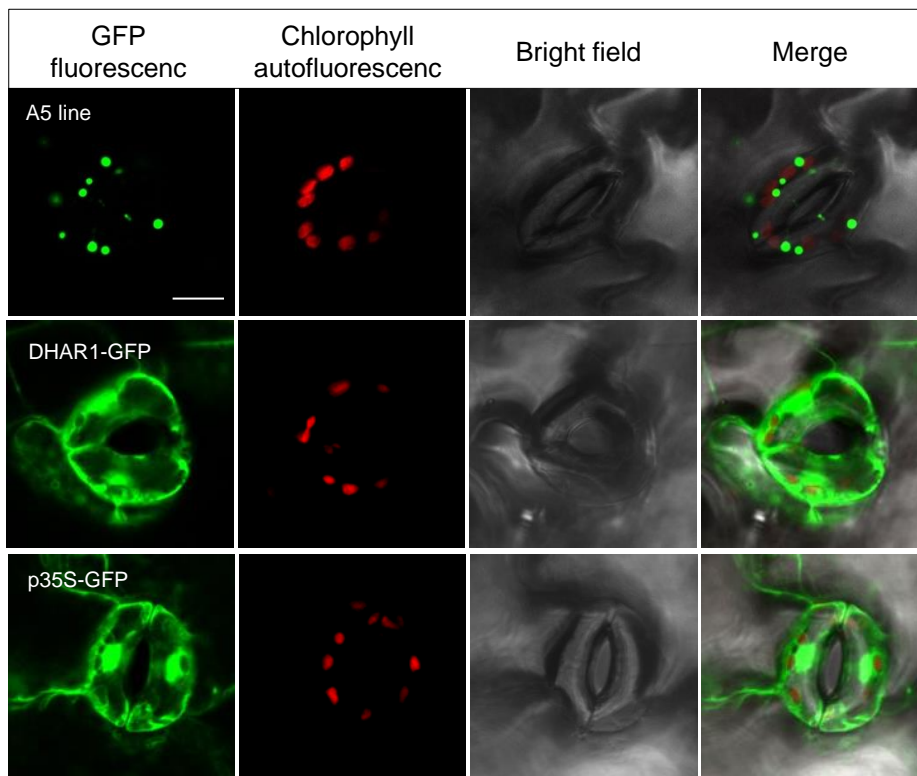

**Supplemental Figure S6.** Comparison of DHAR1-GFP signals in leaves with a positive control for peroxisomal targeting. Fluorescence signals were examined in leaves of the *cat2 dhar1 dhar2 dhar3* mutant transformed with the genes indicated, as follows. Top, positive control for peroxisomal targeting sequence 1 (A5 line; Cutler et al., 2000). Middle, DHAR1-GFP. Bottom, 35S-GFP. The scale bar indicates 10  $\mu$ m.

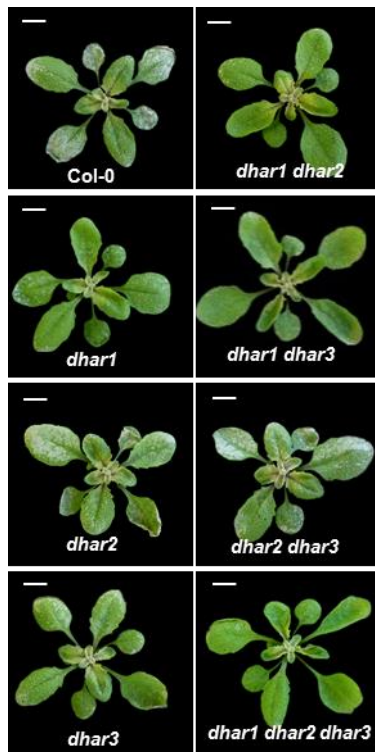

**Supplemental Figure S7.** Bleaching phenotypes of *Col-0* and *dharm* mutants 2d after spraying with 3-AT. The scale bar indicates 1 cm.

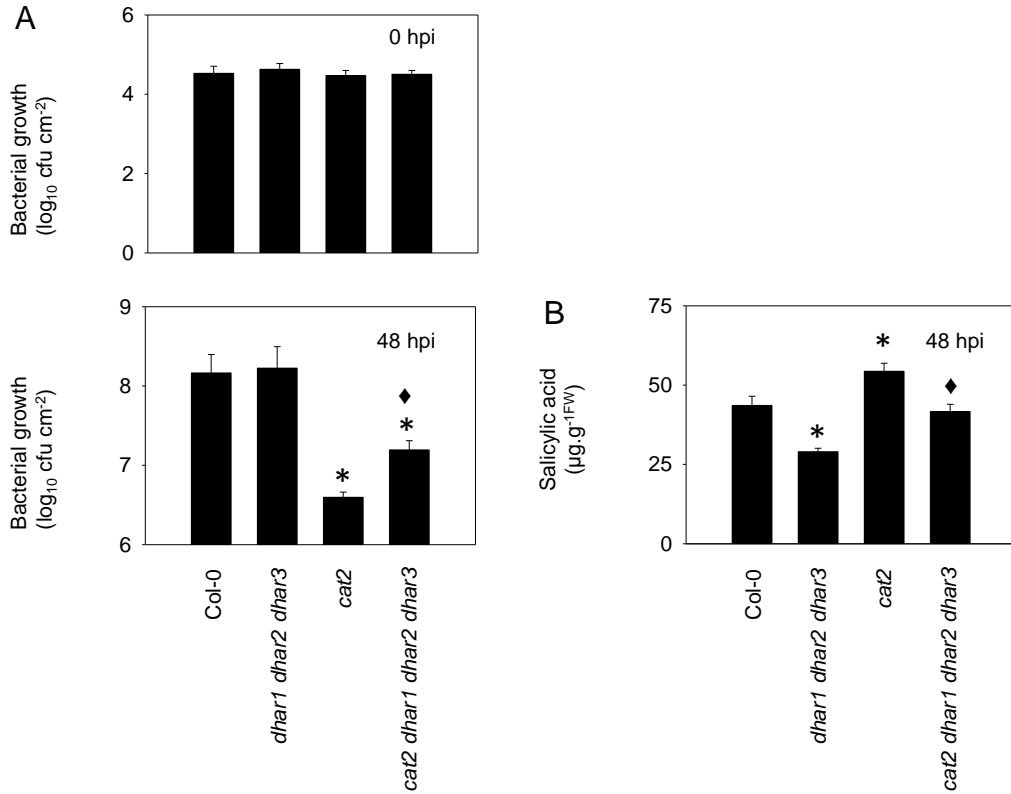

**Supplemental Figure S8.** Effect of *dhar1 dhar2 dhar3* triple mutation on resistance to *Pto* DC3000 in the Col-0 and *cat2* backgrounds.

(A) Bacterial growth in the four genotypes. Top, 0 hours post-inoculation (hpi). Bottom, 48 hpi.

(B) Leaf salicylic acid at 48 hpi.

\*Significant difference between mutant and Col-0 at  $P < 0.05$ . ♦ Significant difference between *cat2* and the quadruple mutant at  $P < 0.05$ .
