# Supplementary material
Source: PubMed Central journal article supplement (PMC5462045)
Supplement: supp_pp.17.00317_PP2017-RA-00317D_Supplemental_Material_Tables_1_to_6.pdf [file supp_pp.17.00317_PP2017-RA-00317D_Supplemental_Material_Tables_1_to_6.pdf]

1 **Supplemental Table S1.** Ascorbate and glutathione redox states in Col-0 and *dhar* mutants.

2 Data show 100 x (reduced form/total) and are means of three biological replicates. No significant  
3 differences were observed in *dhar* mutants compared to Col-0 at  $P < 0.05$ .

4

---

|                             | Ascorbate | Glutathione |
|-----------------------------|-----------|-------------|
| 5 Col-0                     | 87 ± 1.25 | 91 ± 1.23   |
| 6 <i>dhar1</i>              | 86 ± 0.61 | 88 ± 1.07   |
| 7 <i>dhar2</i>              | 88 ± 1.65 | 90 ± 0.51   |
| 8 <i>dhar3</i>              | 89 ± 4.34 | 86 ± 1.18   |
| 9 <i>dhar1 dhar2</i>        | 86 ± 1.36 | 90 ± 2.34   |
| 10 <i>dhar1 dhar3</i>       | 85 ± 3.11 | 90 ± 2.09   |
| 11 <i>dhar2 dhar3</i>       | 86 ± 1.51 | 91 ± 1.43   |
| 12 <i>dhar1 dhar2 dhar3</i> | 83 ± 1.53 | 88 ± 0.31   |

13

14

15

16

17

18

19 **Supplemental Table S2.** Ascorbate and glutathione redox states in Col-0, *cat2* and *cat2 dhar* mutants

20 Data show 100 x (reduced form/total) and are means of three biological replicates. \*Indicates  
21 significant difference compared to Col-0 while +indicates significant difference of *cat2 dhar* mutants  
22 compared to *cat2* at  $P < 0.05$ .

23

24

---

|                                  | Ascorbate  | Glutathione             |
|----------------------------------|------------|-------------------------|
| 25                               |            |                         |
| 26 Col-0                         | 89 ± 0.92  | 91 ± 2.67               |
| 27 <i>cat2</i>                   | 85 ± 2.14  | 64 ± 0.82*              |
| 28 <i>cat2 dhar1</i>             | 84 ± 1.54* | 59 ± 3.45*              |
| 29 <i>cat2 dhar2</i>             | 79 ± 1.21* | 50 ± 2.21* <sup>+</sup> |
| 30 <i>cat2 dhar3</i>             | 84 ± 2.05  | 61 ± 2.39*              |
| 31 <i>cat2 dhar1 dhar2</i>       | 82 ± 2.52  | 79 ± 2.02* <sup>+</sup> |
| 32 <i>cat2 dhar1 dhar3</i>       | 82 ± 1.37* | 58 ± 4.31*              |
| 33 <i>cat2 dhar2 dhar3</i>       | 84 ± 3.21  | 58 ± 2.93*              |
| 34 <i>cat2 dhar1 dhar2 dhar3</i> | 80 ± 0.71* | 86 ± 1.44 <sup>+</sup>  |

35

36

37

38 **Supplemental Table S3.** T2 segregation of DHAR-complemented lines growing in vitro on agar.

39 Transformed plants were identified *in vitro* based on their resistance (R) or sensitivity (S) to  
40 hygromycin.

41

---

| 42 | Lines          | Total | Hygromycin R | Hygromycin S | $\chi^2$ ( $P < 0.05$ ) |
|----|----------------|-------|--------------|--------------|-------------------------|
| 43 | <i>dhar1-1</i> | 120   | 86           | 34           | 0.40                    |
| 44 | <i>dhar1-2</i> | 116   | 88           | 28           | 0.83                    |
| 45 | <i>dhar2-1</i> | 117   | 85           | 32           | 0.56                    |
| 46 | <i>dhar2-2</i> | 120   | 85           | 35           | 0.29                    |
| 47 | <i>dhar3-1</i> | 129   | 88           | 41           | 0.08                    |
| 48 | <i>dhar3-2</i> | 114   | 92           | 22           | 0.16                    |

49

50

51

52

53 **Supplemental Table S4.** T2 segregation of lesion phenotypes in complemented lines growing in soil.

54 Data show numbers of plants showing either the *cat2* lesion phenotype or the *cat2 dhar1 dhar2*

55 *dhar3* phenotype in two independent experiments performed on plants growing in soil.

---

| 56 | Expt 1         |       | Phenotype   |                  |                         |
|----|----------------|-------|-------------|------------------|-------------------------|
| 57 | Lines          | Total | <i>cat2</i> | quadruple mutant | $\chi^2$ ( $P < 0.05$ ) |
| 58 | <i>dhar1-1</i> | 44    | 33          | 11               | 1.00                    |
| 59 | <i>dhar1-2</i> | 56    | 43          | 13               | 0.76                    |
| 60 | <i>dhar2-1</i> | 47    | 36          | 11               | 0.80                    |
| 61 | <i>dhar2-2</i> | 50    | 38          | 12               | 0.87                    |
| 62 | <i>dhar3-1</i> | 46    | 35          | 11               | 0.86                    |
| 63 | <i>dhar3-2</i> | 48    | 36          | 12               | 1.00                    |

64

| 65 | Expt 2         |       | Phenotype   |                  |                         |
|----|----------------|-------|-------------|------------------|-------------------------|
| 66 | Lines          | Total | <i>cat2</i> | quadruple mutant | $\chi^2$ ( $P < 0.05$ ) |
| 67 | <i>dhar1-1</i> | 47    | 35          | 12               | 0.93                    |
| 68 | <i>dhar1-2</i> | 52    | 41          | 11               | 0.52                    |
| 69 | <i>dhar2-1</i> | 57    | 43          | 14               | 0.94                    |
| 70 | <i>dhar2-2</i> | 39    | 29          | 10               | 0.93                    |
| 71 | <i>dhar3-1</i> | 51    | 39          | 12               | 0.81                    |
| 72 | <i>dhar3-2</i> | 45    | 33          | 12               | 0.80                    |

73

74

75

76 **Supplemental Table S5.** Glutathione redox states in Col-0 and *dhar* mutants after treatment with 3-  
77 amino-1,2,4-triazole.

78 Data show 100 x (reduced form/total) and are means of three biological replicates. \*Indicates  
79 significant difference compared to Col-0 at  $P < 0.05$ .

---

|    |                          |            |
|----|--------------------------|------------|
| 80 | Col-0                    | 41 ± 3.61  |
| 81 | <i>dhar1</i>             | 41 ± 5.00  |
| 82 | <i>dhar2</i>             | 36 ± 6.28  |
| 83 | <i>dhar3</i>             | 27 ± 6.40  |
| 84 | <i>dhar1 dhar2</i>       | 66 ± 0.87* |
| 85 | <i>dhar1 dhar3</i>       | 54 ± 5.77  |
| 86 | <i>dhar2 dhar3</i>       | 39 ± 2.97  |
| 87 | <i>dhar1 dhar2 dhar3</i> | 84 ± 2.75* |

88

89

90

91

92

93 **Supplemental Table S6.** DNA primer sequences used in this study.

| 94  | Oligonucleotide | Sequence                          | Technique  |
|-----|-----------------|-----------------------------------|------------|
| 95  |                 |                                   |            |
| 96  | For_CAT2        | 5'-CCCAGAGGTACCTCTTCTTCTCCCATG-3' | Genotyping |
| 97  | Rev_CAT2        | 5'-TCAGGGAACCTCATCCCATCGC-3'      | Genotyping |
| 98  | For_DHAR1       | 5'-TTAGGTCCGTTCCAGCCAAC-3'        | Genotyping |
| 99  | Rev_DHAR1       | 5'-AAGCTCTCAGGGACAGACCAG-3'       | Genotyping |
| 100 | For_DHAR2       | 5'-AATGGGTGGCTGATTCTGAC-3'        | Genotyping |
| 101 | Rev_DHAR2       | 5'-GATCCACATCACGCATTAC-3'         | Genotyping |
| 102 | For_DHAR3       | 5'-GTTACTGACAATGGAGGAGAAG-3'      | Genotyping |
| 103 | Rev_DHAR3       | 5'-GTGCCAAGGACAAATCTGC-3'         | Genotyping |
| 104 | Lb1             | 5'-TGGACCGCTTGCTGCAACTCTC-3'      | Genotyping |
| 105 | LB_Sail         | 5'-GAAATGGATAAATAGCCTTGCTTCC-3'   | Genotyping |
| 106 | For_Actin2      | 5'-TTCCTCAGCACATTCCAGCAG-3'       | RT-PCR     |
| 107 | Rev_Actin2      | 5'-TTAACATTGCAAAGAGTTTCAAGG-3'    | RT-PCR     |
| 108 | For_CAT2        | 5'-GTGCTGACTTTCTCCGAGCT-3'        | RT-PCR     |
| 109 | Rev_CAT2        | 5'-CCTGAACCATCCATGTGCCT-3'        | RT-PCR     |
| 110 | For_DHAR1       | 5'-TGGCTCTGGAAATCTGTG-3'          | RT-PCR     |
| 111 | Rev_DHAR1       | 5'-AGCAAGGCATGTTCCAGATCC-3'       | RT-PCR     |
| 112 | For_DHAR2       | 5'-AATGGGTGGCTGATTCTGAC-3'        | RT-PCR     |
| 113 | Rev_DHAR2       | 5'-CCGCAACCACAATCTCTTTC-3'        | RT-PCR     |
| 114 | For_DHAR3       | 5'-GTTACTGACAATGGAGGAGAAG-3'      | RT-PCR     |
| 115 | Rev_DHAR3       | 5'-GTGCCAAGGACAAATCTGC-3'         | RT-PCR     |
| 116 | For_Actin2      | 5'-CTGTACGGTAACATTGTGCTCAG -3'    | RT-qPCR    |
| 117 | Rev_Actin2      | 5'-CCGATCCAGACACTGTACTTCC -3'     | RT-qPCR    |
| 118 | For_RCE1        | 5'-CTGTTACGGAAACCAATTC-3'         | RT-qPCR    |
| 119 | Rev_RCE1        | 5'-GGAAAAAGGTCTGACCGACA-3'        | RT-qPCR    |
| 120 | For_PR1         | 5'-AGGCTAACTACAACACTACGCTGCG-3'   | RT-qPCR    |
| 121 | Rev_PR1         | 5'-GCTTCTCGTTCACATAATCCAC-3'      | RT-qPCR    |

|     |                                  |                                               |         |
|-----|----------------------------------|-----------------------------------------------|---------|
| 122 | For_PR2                          | 5'-TCAAGGAGCTTAGCCTCACC-3'                    | RT-qPCR |
| 123 | Rev_PR2                          | 5'-CGCCTAGCATCCCGTAGC-3'                      | RT-qPCR |
| 124 | For_ICS1                         | 5'-TTGGTGGCGAGGAGAGTG-3'                      | RT-qPCR |
| 125 | Rev_ICS1                         | 5'-CTTCCAGCTACTATCCCTGTCC-3'                  | RT-qPCR |
| 126 |                                  |                                               |         |
| 127 | Amplification with stop codon    |                                               |         |
| 128 | For_Sall_DHAR1                   | 5'-GCGCGTCGACAAATGGCTCTGGAAATCTGTGTG-3'       | Cloning |
| 129 | Rev_DHAR1_stop_NotI              | 5'-TTTTGCGGCCGCTTCAAGGGTTAACCTTGGGAG-3'       | Cloning |
| 130 | For_Sall_DHAR2                   | 5'-ACGCGTCGACGTATGGCTCTAGATATCTGCGTGAAGG-3'   | Cloning |
| 131 | Rev_DHAR2_stop_NotI              | 5'-ATTTGCGGCCGCTTTCACGCATTCACCTTCG-3'         | Cloning |
| 132 | For_Sall_DHAR3                   | 5'-ACGCGTCGACGTATGATAAGCCTTAGGTTTCAACCAAGC-3' | Cloning |
| 133 | Rev_DHAR3_stop_NotI              | 5'-ATTTGCGGCCGCTTTTAAACCATAACCTTTGGTCTCC-3'   | Cloning |
| 134 |                                  |                                               |         |
| 135 | Amplification without stop codon |                                               |         |
| 136 | For_Sall_DHAR1                   | 5'-GCGCGTCGACAAATGGCTCTGGAAATCTGTGTG-3'       | Cloning |
| 137 | Rev_DHAR1_NotI                   | 5'-TTTTGCGGCCGCTTAGGGTTAACCTTGGGAG-3'         | Cloning |
| 138 | For_Sall_DHAR2                   | 5'-ACGCGTCGACGTATGGCTCTAGATATCTGCGTGAAGG-3'   | Cloning |
| 139 | Rev_DHAR2_NotI                   | 5'-ATTTGCGGCCGCTTCGCATTCACCTTCGATTC-3'        | Cloning |
| 140 | For_Sall_DHAR3                   | 5'-ACGCGTCGACGTATGATAAGCCTTAGGTTTCAACCAAGC-3' | Cloning |
| 141 | Rev_DHAR3_NotI                   | 5'-ATTTGCGGCCGCTTACCATAACCTTTGGTCTCC-3'       | Cloning |
| 142 | For_pENTR2B                      | 5'-CCAGGCATCAAACCTAAGCAG-3'                   | Cloning |
| 143 | Rev_pENTR2B                      | 5'-CTTGTGCAATGTAACATCAGAG-3'                  | Cloning |
| 144 |                                  |                                               |         |

---
